# EUROPEAN JOURNAL OF PUBLIC HEALTH

Volume 17 Supplement 1

## SUPPLEMENT

Public health research literatures in Europe

**Guest Editors: Mark McCarthy and Aileen Clarke**

|                                                                                                                                                      |    |                                                                                                                                                                            |    |
|------------------------------------------------------------------------------------------------------------------------------------------------------|----|----------------------------------------------------------------------------------------------------------------------------------------------------------------------------|----|
| Introduction<br><i>M. McCarthy and A. Clarke</i>                                                                                                     | 1  | Health promotion research literature in Europe<br>1995–2005<br><i>A. Clarke, M. Gatineau, M. Thorogood and<br/>N. Wyn-Roberts</i>                                          | 24 |
| European public health research literatures—measuring<br>progress<br><i>M. McCarthy and A. Clarke</i>                                                | 2  | Genetic epidemiology literature in Europe—<br>an overview<br><i>R. Ádány and Z. Pocsai</i>                                                                                 | 29 |
| Commentary on <i>SPHERE</i> (Strengthening Public Health<br>Research in Europe) literature reviews<br><i>F. Kamper-Jørgensen</i>                     | 6  | A review of health management research<br><i>D.J. Hunter and J. Brown</i>                                                                                                  | 33 |
| Commentary on <i>SPHERE</i> (Strengthening Public Health<br>Research in Europe) literature reviews<br><i>W. Dab</i>                                  | 8  | Health needs and public health functions<br>addressed in French public health journals<br><i>O. Grimaud and S. Devaux</i>                                                  | 38 |
| Health services and systems research in Europe:<br>overview of the literature 1995–2005<br><i>D.M.J. Delnoij and P.P. Groenewegen</i>                | 10 | A bibliometric overview of public health research<br>in Europe<br><i>A. Clarke, M. Gatineau, O. Grimaud, S. Royer-Devaux,<br/>N. Wyn-Roberts, I. Le Bis and G. Lewison</i> | 43 |
| Environmental health research in Europe –<br>bibliometric analysis<br><i>S.M. Tarkowski</i>                                                          | 14 |                                                                                                                                                                            |    |
| Public health research literature on infectious diseases:<br>coverage and gaps in Europe<br><i>P. Durando, L. Sticchi, L. Sasso and R. Gasparini</i> | 19 |                                                                                                                                                                            |    |
